# Supplementary material for: Tumor-Naïve Multimodal Profiling of Circulating Tumor DNA in Head and Neck Squamous Cell Carcinoma
Source: Oxford University Press journal article supplement (doi:10.1158/1078-0432.ccr-21-0110), 2021-06-22
Supplement: ccr-21-0110_figure_s1_suppfs1.docx [file ccr-21-0110_figure_s1_suppfs1.docx]

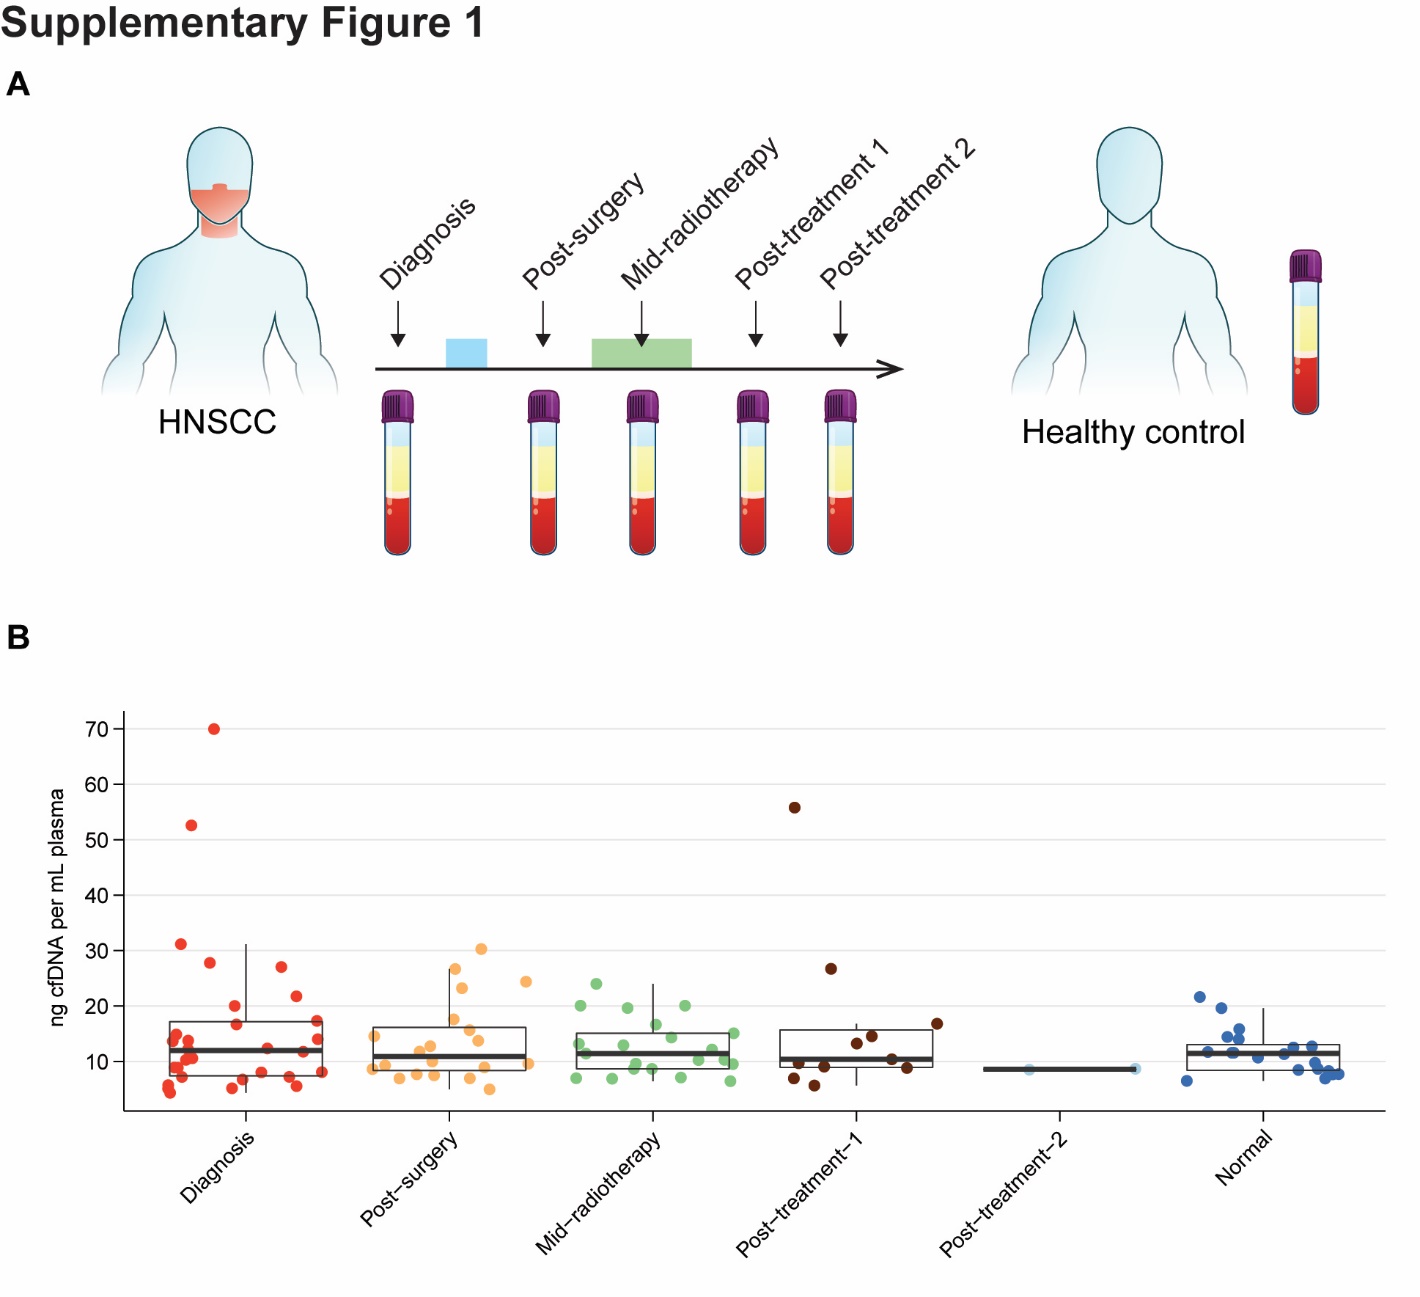
 **Figure S1. Sample characteristics of isolated cell-free DNA from HNSCC and healthy controls.** **A)** Schematic defining timepoints of blood isolation. **B)** cfDNA yields (ng per mL of plasma) across timepoints for HNSCC patients as well as healthy controls (i.e., “Normal”).
