# Supplementary material for: Tumor-Naïve Multimodal Profiling of Circulating Tumor DNA in Head and Neck Squamous Cell Carcinoma
Source: Oxford University Press journal article supplement (doi:10.1158/1078-0432.ccr-21-0110), 2021-06-22
Supplement: ccr-21-0110_figure_s2_suppfs2.docx [file ccr-21-0110_figure_s2_suppfs2.docx]

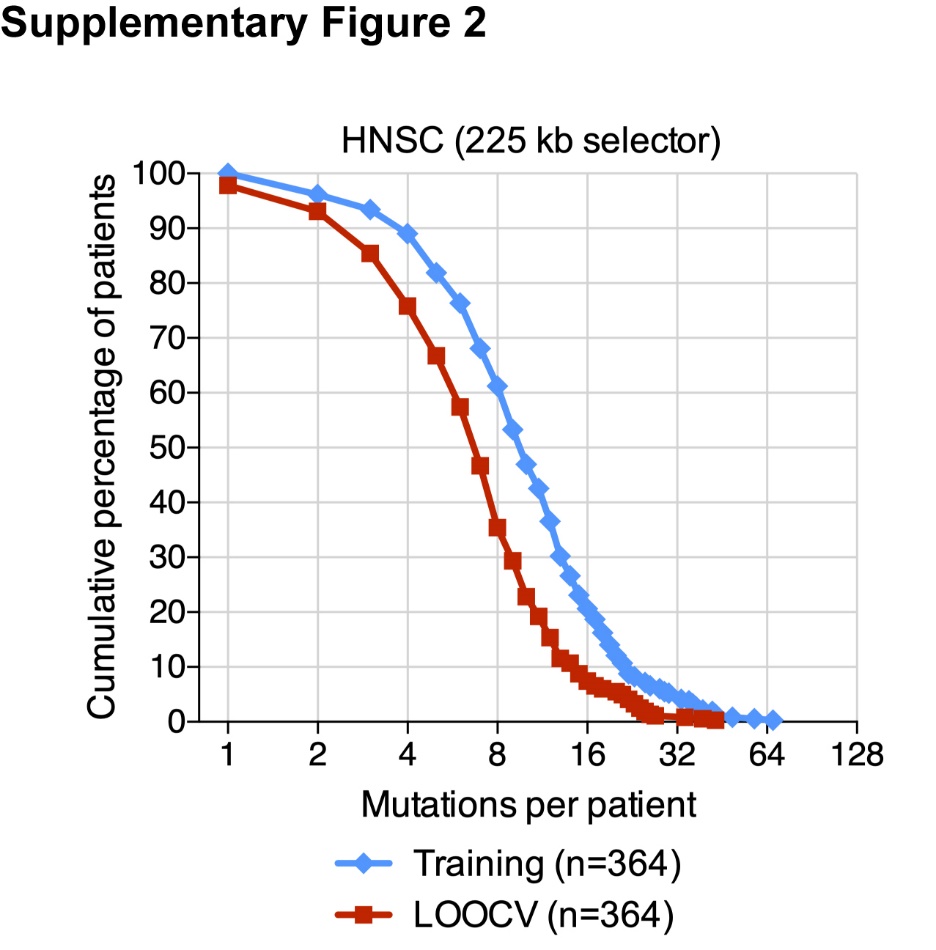


**Figure S2. Coverage of HNSCC CAPP-Seq selector.** Analysis of the number of mutations per HNSCC patient covered by the CAPP-Seq selector assessed either among 364 patients in the HNSC TCGA cohort (Training; blue diamonds) or using leave-one-out cross-validation (LOOCV; red squares).
