# Supplementary material for: Tumor-Naïve Multimodal Profiling of Circulating Tumor DNA in Head and Neck Squamous Cell Carcinoma
Source: Oxford University Press journal article supplement (doi:10.1158/1078-0432.ccr-21-0110), 2021-06-22
Supplement: ccr-21-0110_figure_s4_suppfs4.docx [file ccr-21-0110_figure_s4_suppfs4.docx]

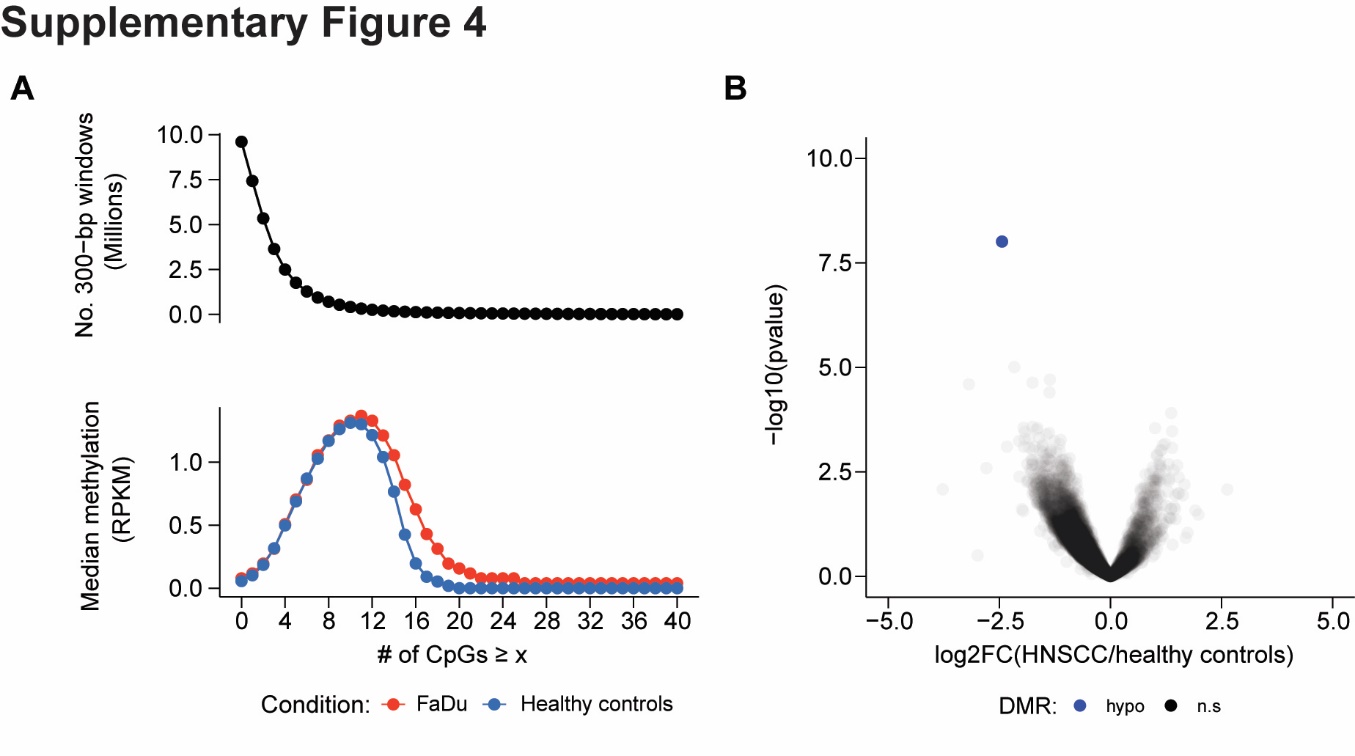


**Figure S4.** **Identification of informative genomic regions (related to Figure 3B, 3C).** **A)** *(Top­)* Number of 300-bp windows with >= CpGs. *(Bottom)* Median read count of methylated DNA fragments in reads per kilobase per million mapped reads (RPKM) for 9,603,454 300-bp non-overlapping bins with ≥ varying minimum numbers of CpGs. Values calculated on chromosomes 1–22. **B)** We compared MeDIP-seq profiles from 30 HNSCC patient PBLs to 20 risk-matched healthy control PBLs within the 99,994 PBL-depleted windows for each sample. This procedure identified a single control-associated region of cfDNA methylation. (Right) Volcano plot of 49,358 genomic regions, each with >20 reads across all samples, displaying -log10 p-value of differential methylation against log2 fold change of relative methylation (RPKMs) from healthy controls to HNSCC patients. Grey: regions without significant differential methylation (false discovery rate ≥10%). Blue: 1 hypomethylated 300-bp regions, with significantly lower methylation in the HNSCC cohort compared to healthy controls.
